# Supplementary material for: A Biochemical Platform to Define the Relative Specific Activity of IDUA Variants Identified by Newborn Screening
Source: MDPI journal article supplement (doi:10.3390/ijns6040088), 2020-11-12
Supplement: s1 [file s1]

## Supplementary Figure 1

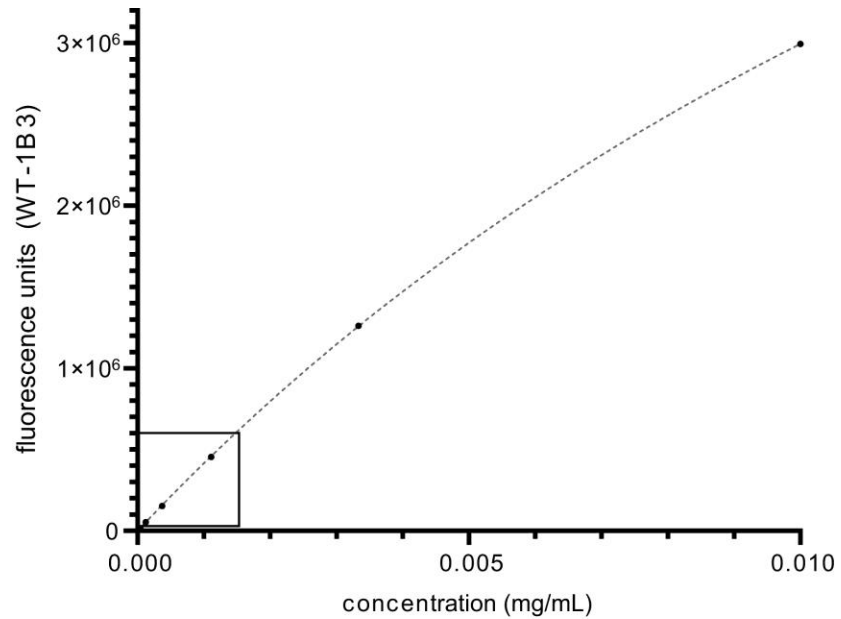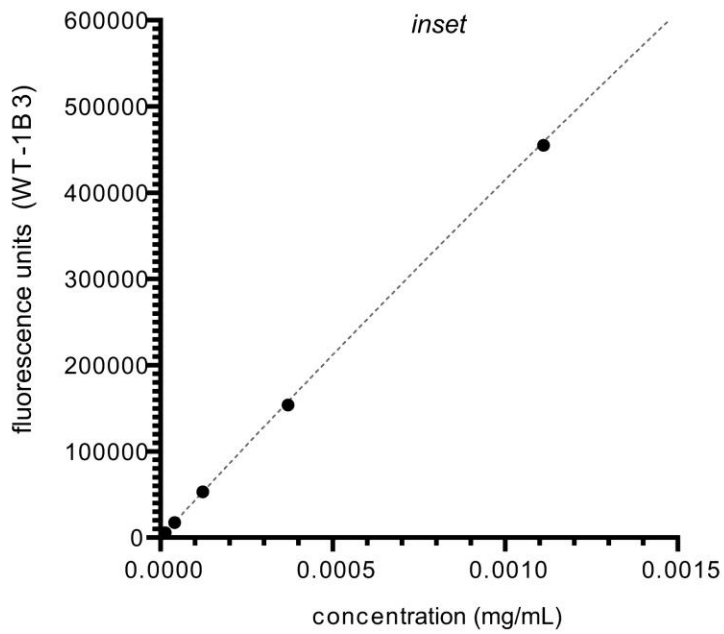

Standard curve for  $\alpha$ -iduronidase activity in WT clone 1B3. Activity is shown as arbitrary fluorescence units and concentration of cell lysate as mg/mL. The box in the top panel is magnified and shown in the bottom panel.

## Supplementary Figure 2

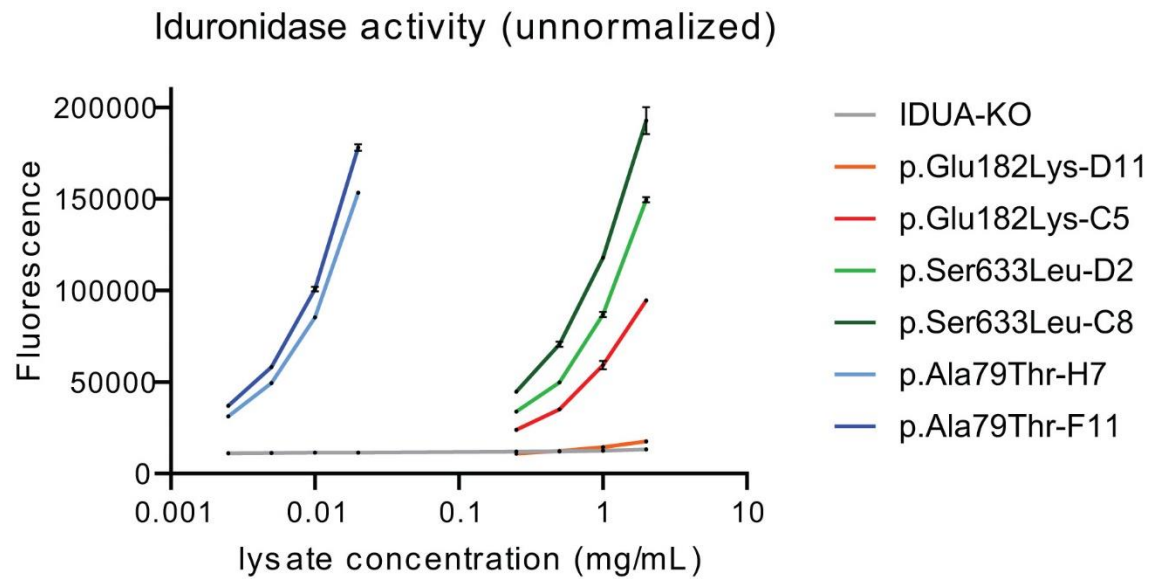

Activity of  $\alpha$ -iduronidase was determined in several clones using a higher lysate concentration for more accurate stratification of residual activity.
